# Supplementary material for: Long-Chain Modification of the Tips and Inner Walls of MWCNTs and Their Nanocomposite Reverse Osmosis Membranes
Source: MDPI journal article supplement (doi:10.3390/membranes12080794), 2022-08-18
Supplement: s1 [file s1]

# Long-Chain Modification of the Tips and Inner Walls of MWCNTs and Their Nanocomposite Reverse Osmosis Membranes

Qing Li <sup>1</sup>, Dengfeng Yang <sup>2</sup>, Qingzhi Liu <sup>2</sup>, Jianhua Wang <sup>2,\*</sup>, Zhun Ma <sup>1</sup>, Dongmei Xu <sup>1</sup> and Jun Gao <sup>1</sup>

<sup>1</sup> College of Chemical and Biological Engineering, Shandong University of Science and Technology, Qingdao 266590, China

<sup>2</sup> College of Chemistry and Pharmaceutical Science, Qingdao Agriculture University, Qingdao 266109, China

\* Correspondence: ygdbbwjh@163.com.

**Table S1.** Materials used in experiment.

| Materials                                      | Specification                                                                                                      | Sources                                          |
|------------------------------------------------|--------------------------------------------------------------------------------------------------------------------|--------------------------------------------------|
| MWCNTs                                         | Purity 98%(Raman), diameter 4.9 nm,<br>Length: 10 to 30 um,<br>Ash<0.5wt%,<br>SSA>350m <sup>2</sup> /g, EC>100s/cm | Beijing gold deco island technology Co., Ltd     |
| Sulfuric acid                                  | Guaranteed reagent                                                                                                 | Laiyang Kant Chemical Co., LTD                   |
| hydrochloric acid                              | Guaranteed reagent                                                                                                 | Laiyang Kant Chemical Co., LTD                   |
| nitric acid                                    | Guaranteed reagent                                                                                                 | Laiyang Kant Chemical Co., LTD                   |
| dimethylformamide (DMF)                        | Analytically pure                                                                                                  | Tianjin Yongda Chemical Reagent Co. LTD          |
| lithium aluminum hydride (LiAlH <sub>4</sub> ) | Analytically pure                                                                                                  | Shanghai Maclean Biochemical Technology Co., LTD |
| pyridine                                       | Analytically pure                                                                                                  | Tianjin Yongda Chemical Reagent Co. LTD          |
| tetrahydrofuran                                | Analytically pure                                                                                                  | Tianjin Fuyu Fine Chemical Co. LTD               |
| ethyl acetate                                  | Analytically pure                                                                                                  |                                                  |
| triethylamine                                  | Analytically pure                                                                                                  | Aladdin Chemical Co., LTD                        |
| dimethyl sulfoxide                             | Analytically pure                                                                                                  | Sinopharm Group Chemical Reagent Co. LTD         |
| m-phenylenediamine (MPD)                       | Analytically pure                                                                                                  | Tianjin Beilian Fine Chemicals Co. LTD           |
| dodecanedioic acid                             |                                                                                                                    | Shanghai Maclean Biochemical Technology Co., LTD |
| trimesoyl chloride(TMC)                        | Analytically pure                                                                                                  | Shanghai Maclean Biochemical Technology Co., LTD |
| camphor-10-sulfonic acid                       | Analytically pure                                                                                                  | Aladdin Chemical Co., LTD                        |
| sodium dodecyl sulfate                         | Chemically pure                                                                                                    | Tianjin Bodi Chemical Co., LTD                   |
| toluene                                        | Analytically pure                                                                                                  | Laiyang Kant Chemical Co., LTD                   |
| oxalyl chloride                                | Chemically pure                                                                                                    | Chengdu Kelong Chemical Reagent Factory          |

|                                                 |                                |                                                        |
|-------------------------------------------------|--------------------------------|--------------------------------------------------------|
| sodium hydrogen carbonate (NaHCO <sub>3</sub> ) | Analytically pure              | Tianjin BASF Chemical Co., LTD                         |
| sodium chloride                                 | Analytically pure              | Tianjin BASF Chemical Co., LTD                         |
| anhydrous magnesium sulfate                     | Analytically pure              | Tianjin BASF Chemical Co., LTD                         |
| potassium hydroxide                             | Analytically pure              | Tianjin BASF Chemical Co., LTD                         |
| methanol                                        | Analytically pure              | Tianjin Fuchen Chemical Reagent Factory                |
| ethanol                                         | Analytically pure              | Tianjin Fuchen Chemical Reagent Factory                |
| n-hexane                                        | Analytically pure              | Sinopharm Group Chemical Reagent Co. LTD               |
| polysulfone (PSF) membranes                     | Aperture: 0.04 0.22 (microns)  | Shenzhen Jiachun Membrane Filtration Equipment Co. LTD |
| polytetrafluoroethylene (PTFE) membranes        | Diameter 50mm, aperture 0.22um | Haiyan New Oriental Plasticizing Technology Co. LTD    |

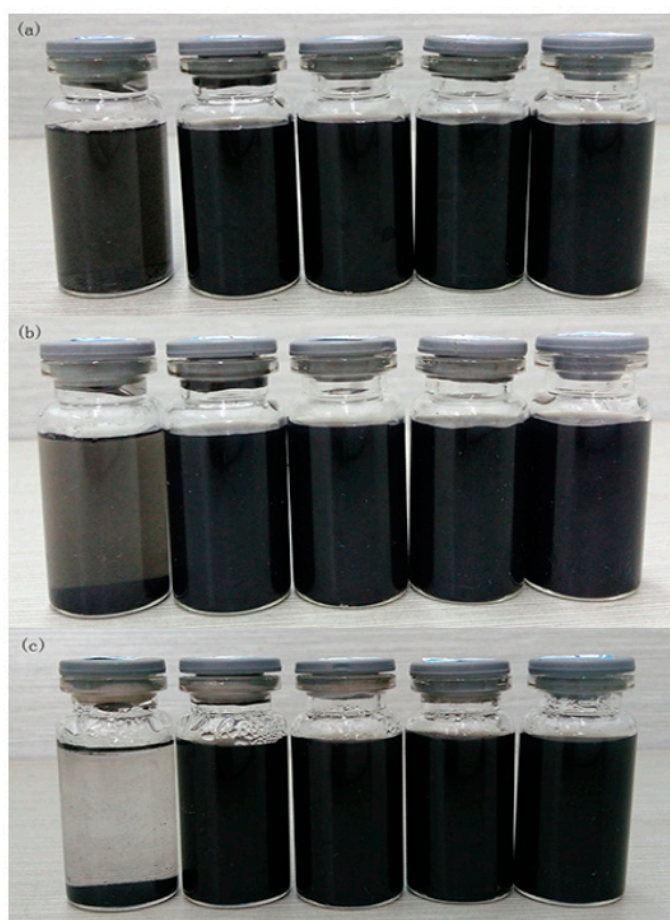

**Figure S1.** Dispersion and stability of samples after ultrasonic 0 h (a), 1 h (b), 40 weeks (c), (samples from left to right are MWCNT, MWCNT-COOH, MWCNT-CH<sub>2</sub>OH, MWCNT-COCl, MWCNT-CH<sub>2</sub>OCOC<sub>12</sub>H<sub>23</sub>O<sub>3</sub>).

In order to determine the effect of chemical modification on the dispersibility and stability of carbon nanotubes, the water dispersibility of MWCNTs was studied by static sedimentation method. MWCNT, MWCNT-COOH, MWCNT-CH<sub>2</sub>OH, MWCNT-COCl, MWCNT-CH<sub>2</sub>OCOC<sub>12</sub>H<sub>23</sub>O<sub>3</sub> was dispersed in water, sonicated for 30 min, and allowed to stand for a while. Figure 2-12 lists the water dispersion of the samples after 0 h (a), 1 h (b), and 40 weeks (c) of ultrasonic standing (samples from left to right are MWCNT, MWCNT-COOH, MWCNT-CH<sub>2</sub>OH, MWCNT-COCl, MWCNT-CH<sub>2</sub>OCOC<sub>12</sub>H<sub>23</sub>O<sub>3</sub>). As shown in Figure S1, the MWCNTs began to coagulate and precipitate after 1 hour of ultrasonic standing, while the MWCNTs with grafted functional groups still maintained good dispersibility and stability after ultrasonic storage for 40 weeks or even longer.

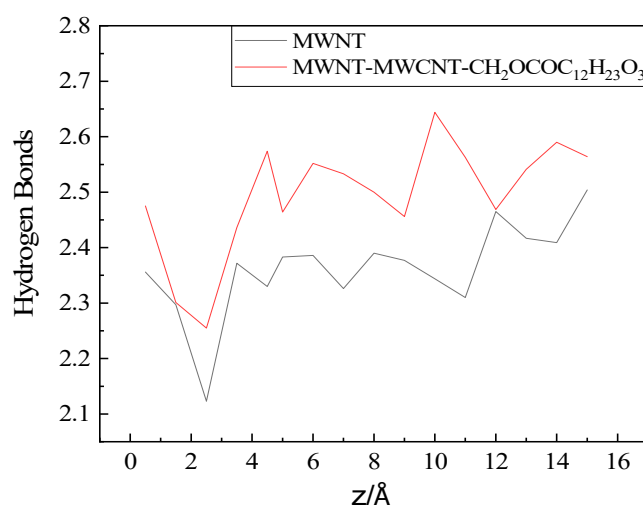

**Figure S2.** Hydrogen Bonds of water molecules in (a) MNNTs (b) MWCNT-CH<sub>2</sub>OCOC<sub>12</sub>H<sub>23</sub>O<sub>3</sub>.
